# Supplementary material for: Corporate Social Responsibility and Consumer Choice: Lessons from the Milk Boycott
Source: Atypon-hosted journal article supplement (doi:10.1287/mnsc.2021.01062), 2024-10-11
Supplement: mnsc.2021.01062.sm1.pdf [file mnsc.2021.01062.sm1.pdf]

# Supplement to “Corporate social responsibility and consumer choice: Lessons from the milk boycott”

In Kyung Kim  
Sogang University

Kyoo il Kim  
Michigan State University

In these online appendices, we (i) estimate the milk demand using a larger sample; (ii) check for the pre-boycott sales and price trends of the boycotted products; (iii) measure the cost pass-through before and after the boycott for each producer; and (iv) present additional tables and figures.

## Appendix A: Milk demand estimation with an extended sample

In the manuscript, we analyze the 14 best-selling brands of the three major producers whose combined revenue share reached 75 percent during the sample period. In this appendix, we examine whether our empirical findings are robust to sample selection. To do so, we increase the number of brands from 14 to 34 by adding the 20 best-selling brands of non-major firms to the sample. Table D2 in Appendix D shows that together, these 34 brands accounted for 97 percent of the white milk sales during the sample period. Since advertising information is not available for these 20 brands, we estimate milk demand without controlling for ad spending:

$$u_{ijrt} = \alpha_i p_{jrt} + \sum_{s=1}^6 \beta_s 1[t \in s] \times \text{Namyang}_j + \xi_j + \xi_r + \xi_t + \Delta \xi_{jrt} + \varepsilon_{ijrt}. \quad (1)$$

We then calculate and report the average (IV and RC logit) marginal effects of each variable on the choice probability in the first two columns of Table A1. The marginal effects of the boycott, although smaller in magnitude compared to our main results in Table 10 in Appendix A.2 of the manuscript, indicate that the negative impact of the boycott on consumer utility persisted long after its outbreak. Moreover, through counterfactual analysis with the extended sample, we discovered that Namyang’s revenue loss would have been over twice as large had the firm not implemented lower prices (a 6.9 percent decrease with the price reduction versus a 15.5 percent decrease without it). Overall, these results with the extended sample support our conclusion that the boycott effects were long-lasting and that price reduction served as an effective strategy to counteract the boycott movement.

Regarding the quantitative changes in the boycott effects when increasing the number of brands in the sample from 14 to 34,<sup>1</sup> it may arise because the newly added 20 brands are mostly local, niche, or private brands with low market shares (as shown in Table D2). Thus, they may not constitute a suitable control group for the two ‘treated’ Namyang brands. In other words, selecting a subset of brands similar in nature to the two boycotted brands as the control group would lead to both *quantitatively* and *qualitatively* robust empirical results.

---

<sup>1</sup>These changes do not appear to be attributable to the exclusion of advertising expenditures as a control variable in the utility model. Indeed, when we use only the 14 brands of the three major producers in estimating model (1), we obtain marginal effects (as reported in the last two columns of Table A1) that closely align with those presented in Table 10 in Appendix A.2 of the manuscript.

Table A1: Marginal effects with an extended sample

| Variable                      | 34 brands           |                     | 14 brands           |                     |
|-------------------------------|---------------------|---------------------|---------------------|---------------------|
|                               | IV logit            | RC logit            | IV logit            | RC logit            |
| <i>Mean utility</i>           |                     |                     |                     |                     |
| Price                         | -0.0170<br>(0.0009) | -0.0185<br>(0.0016) | -0.0521<br>(0.0017) | -0.0534<br>(0.0023) |
| Namyang×1[t ∈ 1]              | -0.0030<br>(0.0009) | -0.0029<br>(0.0009) | -0.0092<br>(0.0020) | -0.0075<br>(0.0016) |
| Namyang×1[t ∈ 2]              | -0.0028<br>(0.0010) | -0.0029<br>(0.0009) | -0.0098<br>(0.0020) | -0.0090<br>(0.0016) |
| Namyang×1[t ∈ 3]              | -0.0015<br>(0.0010) | -0.0019<br>(0.0010) | -0.0079<br>(0.0024) | -0.0081<br>(0.0017) |
| Namyang×1[t ∈ 4]              | -0.0023<br>(0.0011) | -0.0029<br>(0.0010) | -0.0070<br>(0.0023) | -0.0075<br>(0.0019) |
| Namyang×1[t ∈ 5]              | -0.0037<br>(0.0011) | -0.0041<br>(0.0010) | -0.0100<br>(0.0022) | -0.0100<br>(0.0017) |
| Namyang×1[t ∈ 6]              | -0.0017<br>(0.0012) | -0.0019<br>(0.0013) | -0.0074<br>(0.0024) | -0.0079<br>(0.0020) |
| <i>Consumer heterogeneity</i> |                     |                     |                     |                     |
| ln(y)                         |                     | 0.0048<br>(0.0005)  |                     | 0.0155<br>(0.0010)  |
| v                             |                     | 0.0036<br>(0.0008)  |                     | 0.0167<br>(0.0008)  |
| Fixed effects                 |                     |                     |                     |                     |
| Product                       | Yes                 | Yes                 | Yes                 | Yes                 |
| Region                        | Yes                 | Yes                 | Yes                 | Yes                 |
| Time                          | Yes                 | Yes                 | Yes                 | Yes                 |

Note: The table presents the average marginal effect (across all observations) of each variable on the choice probability. 34 brands (14 brands of the three major producers) are used in the first two columns (next two columns). Standard errors estimated using the delta method are in parentheses.

## Appendix B: Pre-boycott sales and price trends

Here, we check for the pre-boycott sales and price trends of Namyang products with the following difference-in-differences model:

$$\ln y_{jrt} = \beta_0 + \sum_t \beta_t t \times Namyang_j + \xi_j + \xi_r + \xi_t + \varepsilon_{jrt}, \quad (2)$$

where we use the log sales volume and the log price as the dependent variable one by one.  $t$  is an indicator for each time except for April 2013, the last month of the pre-boycott period. The coefficient  $\beta_t$  captures the sales (or price) difference between Namyang and others at time  $t$  relative to the sales (or price) difference in April 2013. We conduct the analysis for a window of 12 months before and after the boycott outbreak.

We present point estimates of  $\beta_t$  along with the 95 percent confidence bands in Figure B1. There is no evidence that the sales and prices of the boycotted firm deviated from those of its non-boycotted rivals during the pre-boycott period. Based on these observations, we argue that changes in relative sales and prices of Namyang during the post-boycott period were caused by the boycott. The two panels of the figure also show that sales of Namyang decreased by 20.5 and 15.2

percent in May and June 2013, respectively, and then quickly recovered afterward thanks to the firm’s price cut starting in July 2013.

Figure B1: Relative sales and price trends of Namyang

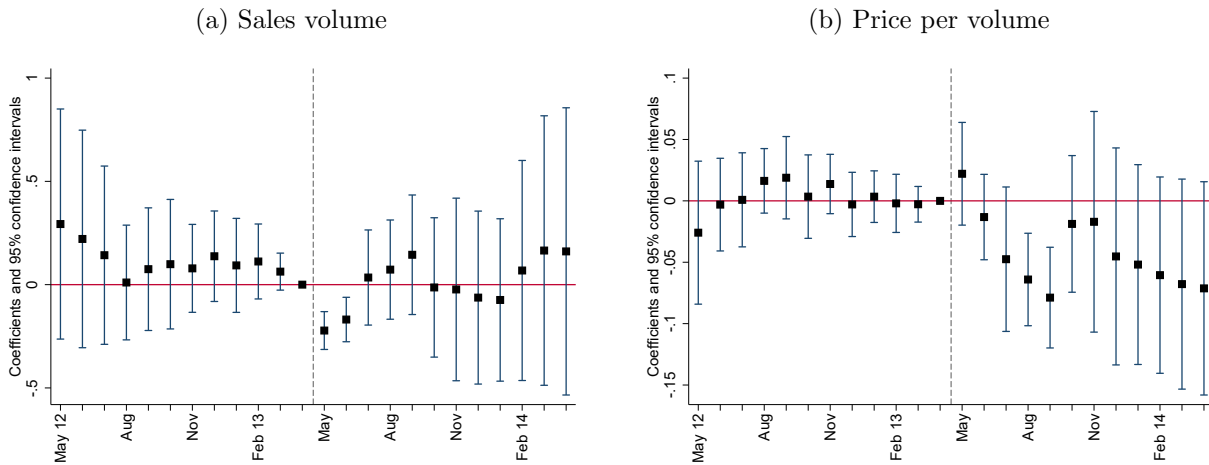

Note: The figure presents estimated  $\beta_t$  in the difference-in-differences model (2) and the 95 percent confidence bands. The log sales and the log price are used as the dependent variable in panel (a) and panel (b), respectively.

## Appendix C: Cost pass-through before and after the boycott

For our counterfactual analysis in Section 5, we assume that the non-boycotted firms did not make any price adjustments to take advantage of the boycott over and above those in response to changes in other market factors. To see whether the data support this assumption, we consider the following specification:

$$\ln p_{jrt} = \alpha_p \ln rp_t + \beta_p T_t \times \ln rp_t + \psi_r + \psi_j + \varepsilon_{jrt}, \quad (3)$$

where subscripts  $j$ ,  $r$ , and  $t$  represent product, region, and time (year-month), respectively.  $\ln p$  and  $\ln rp$  are the log price and the log raw milk price index, respectively, and  $T_t$  is an indicator for the post-boycott period. The model also includes region and product fixed effects,  $\psi_r$  and  $\psi_j$ .

In the model, the coefficient  $\alpha_p$  measures the cost pass-through during the pre-boycott period, while  $\beta_p$  captures the change in the pass-through rate after the outbreak of the boycott. Given the spike in the raw milk price in late 2013 (as shown in the bottom left panel of Figure 2 in the manuscript and the relatively modest increase in the price of Namyang products (as shown in the top right panel of Figure 2), we anticipate that  $\beta_p$  would be negative for Namyang products. Regarding non-boycotted products, if the boycott did not impact their prices, then the coefficient  $\beta_p$  would be non-negative; non-boycotted firms would have increased their prices as much as they did prior to the boycott outbreak, or even more, considering the asymmetry of the cost pass-through (Peltzman, 2000; Tappata, 2009).

We estimate the cost pass-through model (3) separately for each of the three major milk producers as well as others as a whole.<sup>2</sup> Estimates reported in Table C1 are consistent with our conjectures; the cost pass-through of Namyang decreased after the outbreak of the boycott, whereas the pass-

<sup>2</sup>As in Appendix A, we use observations of the 34 top-selling products.

through rates of non-boycotted firms increased. This finding is consistent with our assumption of non-boycotted firms' irresponsiveness to the boycott.

Table C1: Cost pass-through before and after the boycott

| Parameter         | Seoul               | Namyang              | Maeil               | Others              |
|-------------------|---------------------|----------------------|---------------------|---------------------|
| $\alpha_p$        | 0.529***<br>(0.016) | 0.507***<br>(0.014)  | 0.287***<br>(0.014) | 0.543***<br>(0.019) |
| $\beta_p$         | 0.005***<br>(0.001) | -0.002***<br>(0.001) | 0.007***<br>(0.001) | 0.003***<br>(0.001) |
| Fixed effects     |                     |                      |                     |                     |
| Region            | Yes                 | Yes                  | Yes                 | Yes                 |
| Product           | Yes                 | Yes                  | Yes                 | Yes                 |
| <i>R</i> -squared | 0.877               | 0.923                | 0.932               | 0.735               |
| Observations      | 3,614               | 1,370                | 3,024               | 10,859              |

Note: The table presents the OLS estimation results of the cost pass-through model (3) where the log price is the dependent variable. Standard errors (clustered by market) are in parentheses. The notation \*\*\* indicates significance at 1% level, \*\* at 5% level, \* at 10% level.

## Appendix D: Additional tables and figures

Table D1: Number of households and sales record of white milk by region

| Region   | # of households |         | Sales volume |         | Sales revenue |         |
|----------|-----------------|---------|--------------|---------|---------------|---------|
| Kyunggi  | 3,831           | (22.3%) | 133,636      | (25.0%) | 285           | (24.6%) |
| Seoul    |                 |         |              |         |               |         |
| - South  | 1,796           | (10.5%) | 68,265       | (12.8%) | 150           | (13.0%) |
| - North  | 1,709           | (10.0%) | 59,481       | (11.1%) | 128           | (11.1%) |
| Busan    | 1,244           | (7.3%)  | 41,243       | (7.7%)  | 92            | (8.0%)  |
| Kyungnam | 1,151           | (6.7%)  | 40,245       | (7.5%)  | 90            | (7.8%)  |
| Kyungbuk | 1,005           | (5.9%)  | 22,377       | (4.2%)  | 49            | (4.2%)  |
| Incheon  | 919             | (5.4%)  | 27,981       | (5.2%)  | 60            | (5.1%)  |
| Taeju    | 868             | (5.1%)  | 22,396       | (4.2%)  | 48            | (4.1%)  |
| Chungnam | 749             | (4.4%)  | 16,111       | (3.0%)  | 35            | (3.0%)  |
| Jeonnam  | 681             | (4.0%)  | 15,718       | (2.9%)  | 35            | (3.0%)  |
| Jeonbuk  | 660             | (3.8%)  | 16,187       | (3.0%)  | 35            | (3.0%)  |
| Chungbuk | 559             | (3.3%)  | 12,607       | (2.4%)  | 27            | (2.4%)  |
| Kangwon  | 558             | (3.3%)  | 13,910       | (2.6%)  | 30            | (2.6%)  |
| Taejeon  | 533             | (3.1%)  | 16,204       | (3.0%)  | 34            | (3.0%)  |
| Gwangju  | 516             | (3.0%)  | 17,172       | (3.2%)  | 37            | (3.2%)  |
| Wolsan   | 374             | (2.2%)  | 10,005       | (1.9%)  | 22            | (1.9%)  |

Note: The table presents the number of households in 2010 and the sales record of white milk in 2012, categorized by region. The number of households is in 1,000, while the sales volume is in 1,000 liters and sales revenue is in million US dollars. Source: 2010 Population Census and NielsenIQ.

Table D2: Product list

| Product                   | Rev. share | Manufacturer                   |
|---------------------------|------------|--------------------------------|
| <b>Seoul Milk</b>         | 30.09      | <b>Seoul Dairy Cooperative</b> |
| <b>GT</b>                 | 16.40      | <b>Namyang</b>                 |
| <b>Maeil Milk</b>         | 11.67      | <b>Maeil Dairies</b>           |
| Store Brand               | 6.34       | Store Brand                    |
| <b>Mokjang</b>            | 5.83       | <b>Seoul Dairy Cooperative</b> |
| <b>Low Fat Milk</b>       | 4.41       | <b>Seoul Dairy Cooperative</b> |
| Busanmilk                 | 3.84       | Pusankyungnam Milk             |
| <b>Einstein</b>           | 2.15       | <b>Namyang</b>                 |
| Sowanamu                  | 1.83       | Dongwon                        |
| Good Morning Milk         | 1.74       | Binggrae                       |
| <b>Enfant</b>             | 1.18       | <b>Seoul Dairy Cooperative</b> |
| Fresh Milk                | 1.15       | Lotte                          |
| Chammat Milk              | 1.08       | Binggrae                       |
| Low Fat Milk              | 0.93       | Lotte                          |
| <b>365</b>                | 0.83       | <b>Seoul Dairy Cooperative</b> |
| <b>Maeil Joeun</b>        | 0.82       | <b>Maeil Dairies</b>           |
| Ppeoga Teunteun           | 0.80       | Purmil                         |
| <b>Sangha Mokjang</b>     | 0.73       | <b>Maeil Dairies</b>           |
| Chukhyup Milk             | 0.61       | Pusankyungnam Milk             |
| <b>Sohwaga Jaldoeneun</b> | 0.56       | <b>Maeil Dairies</b>           |
| Denmark                   | 0.36       | Dongwon                        |
| Zero Fat Milk             | 0.36       | Lotte                          |
| <b>Absolute W Milk</b>    | 0.35       | <b>Maeil Dairies</b>           |
| <b>Matitneun Milk</b>     | 0.35       | <b>Namyang</b>                 |
| Morning Fresh             | 0.34       | Vilac                          |
| Denish The Healthy        | 0.32       | Dongwon                        |
| Low Fat Milk              | 0.30       | Pusankyungnam Milk             |
| Fresh Plus                | 0.27       | Vilac                          |
| Sinseonhago Matjoeun      | 0.26       | Purmil                         |
| Low Fat Milk              | 0.23       | Purmil                         |
| Choyuneeun Milk           | 0.20       | Ildong Food'is                 |
| Jeongilpum                | 0.19       | Pusankyungnam Milk             |
| <b>Milk Master</b>        | 0.19       | <b>Seoul Dairy Cooperative</b> |
| Daegwanryeong Gowon Milk  | 0.17       | Samyang Food                   |
| Total                     | 96.86      |                                |

Note: The table lists the 34 top-selling products between January 2011 and April 2014. The 14 brands in bold type are produced by the three major firms.

Table D3: Post-boycott sales and revenue gaps  
in the first three and last nine months of the 12-month post-boycott period

| Product                             | First three months |       |               |       | Last nine months |      |               |      |
|-------------------------------------|--------------------|-------|---------------|-------|------------------|------|---------------|------|
|                                     | Sales volume       |       | Sales revenue |       | Sales volume     |      | Sales revenue |      |
|                                     | Gap                | %     | Gap           | %     | Gap              | %    | Gap           | %    |
| <i>Panel A: Namyang brand</i>       |                    |       |               |       |                  |      |               |      |
| GT                                  | -4,300             | -16.4 | -12,650       | -18.2 | -3,083           | -4.4 | -19,787       | -9.8 |
| Einstein                            | -789               | -36.1 | -2,803        | -34.2 | 24               | 0.6  | -917          | -5.3 |
| <b>Total</b>                        | -5,089             | -17.9 | -15,453       | -19.9 | -3,059           | -4.1 | -20,705       | -9.5 |
| <i>Panel B: Non-boycotted brand</i> |                    |       |               |       |                  |      |               |      |
| Seoul Milk                          | 1,603              | 4.1   | 4,165         | 4.1   | 1,477            | 1.4  | 4,232         | 1.4  |
| Maeil Milk                          | 724                | 4.2   | 1,839         | 4.2   | 539              | 1.3  | 1,513         | 1.3  |
| Mokjang                             | 305                | 4.5   | 904           | 4.5   | 312              | 1.5  | 970           | 1.5  |
| Low Fat Milk                        | 226                | 4.0   | 612           | 4.0   | 198              | 1.1  | 579           | 1.1  |
| 365                                 | 78                 | 4.3   | 198           | 4.3   | 83               | 1.0  | 204           | 1.1  |
| Enfant                              | 71                 | 4.0   | 159           | 4.0   | 71               | 2.3  | 277           | 2.4  |
| Maeil Joeun                         | 60                 | 5.3   | 216           | 5.3   | 31               | 1.3  | 89            | 1.3  |
| Sangha Mokjang                      | 25                 | 4.4   | 77            | 4.4   | 65               | 3.0  | 330           | 3.0  |
| Sohwaga Jaldoeneun                  | 12                 | 3.8   | 28            | 3.9   | 22               | 1.5  | 78            | 1.5  |
| Milk Master                         | 21                 | 6.6   | 129           | 6.6   | 8                | 1.0  | 18            | 1.0  |
| Absolute W Milk                     | 16                 | 5.3   | 58            | 5.4   | 10               | 2.5  | 41            | 2.6  |
| <b>Total</b>                        | 3,141              | 4.2   | 8,383         | 4.2   | 2,817            | 1.4  | 8,332         | 1.4  |

Note: The table presents the sales and revenue effects of the boycott for both boycotted and non-boycotted products in the first three and last nine months of the 12-month post-boycott period. Sales and revenue gaps are in 1,000 liters and million KRW, respectively.

Table D4: Sensitivity analysis: Boycott effects with Namyang's price and advertising adjustments

| Product                         | 100 draws          |       | Pre-boycott price ratio |       |            |       |
|---------------------------------|--------------------|-------|-------------------------|-------|------------|-------|
|                                 | of $y_i$ and $v_i$ |       | Apr 2013                |       | Same month |       |
|                                 | Gap                | %     | Gap                     | %     | Gap        | %     |
| <u>Panel A: Sales effects</u>   |                    |       |                         |       |            |       |
| <i>Namyang brand</i>            |                    |       |                         |       |            |       |
| GT                              | -6,132             | -6.5  | -4,751                  | -5.1  | -3,798     | -4.1  |
| Einstein                        | -883               | -13.5 | -723                    | -11.3 | -1,191     | -17.4 |
| <i>Non-boycotted brand</i>      |                    |       |                         |       |            |       |
| Seoul Milk                      | 3,294              | 2.3   | 2,321                   | 1.6   | 2,156      | 1.5   |
| Maeil Milk                      | 1,335              | 2.2   | 981                     | 1.6   | 946        | 1.6   |
| Mokjang                         | 705                | 2.6   | 479                     | 1.7   | 432        | 1.6   |
| Low Fat Milk                    | 437                | 1.9   | 309                     | 1.3   | 279        | 1.2   |
| 365                             | 151                | 1.5   | 104                     | 1.0   | 125        | 1.3   |
| Enfant                          | 177                | 4.3   | 109                     | 2.6   | 104        | 2.5   |
| Maeil Joeun                     | 116                | 2.8   | 90                      | 2.2   | 85         | 2.0   |
| Sangha Mokjang                  | 140                | 5.7   | 77                      | 3.1   | 79         | 3.1   |
| Sohwaga Jaldoeneun              | 56                 | 2.7   | 37                      | 1.8   | 32         | 1.6   |
| Milk Master                     | 18                 | 1.6   | 16                      | 1.4   | 12         | 1.0   |
| Absolute W Milk                 | 34                 | 4.9   | 23                      | 3.3   | 21         | 3.0   |
| <u>Panel B: Revenue effects</u> |                    |       |                         |       |            |       |
| <i>Namyang brand</i>            |                    |       |                         |       |            |       |
| GT                              | -29,006            | -10.9 | -26,656                 | -10.1 | -24,471    | -9.3  |
| Einstein                        | -4,197             | -16.2 | -3,587                  | -14.2 | -5,031     | -18.8 |
| <i>Non-boycotted brand</i>      |                    |       |                         |       |            |       |
| Seoul Milk                      | 9,006              | 2.2   | 6,270                   | 1.5   | 5,824      | 1.4   |
| Maeil Milk                      | 3,563              | 2.2   | 2,597                   | 1.6   | 2,484      | 1.5   |
| Mokjang                         | 2,147              | 2.5   | 1,452                   | 1.7   | 1,308      | 1.5   |
| Low Fat Milk                    | 1,231              | 1.9   | 863                     | 1.3   | 773        | 1.2   |
| 365                             | 358                | 1.6   | 245                     | 1.1   | 293        | 1.3   |
| Enfant                          | 673                | 4.3   | 409                     | 2.6   | 391        | 2.5   |
| Maeil Joeun                     | 309                | 2.7   | 238                     | 2.1   | 224        | 1.9   |
| Sangha Mokjang                  | 736                | 5.8   | 415                     | 3.2   | 412        | 3.1   |
| Sohwaga Jaldoeneun              | 185                | 2.7   | 123                     | 1.8   | 106        | 1.5   |
| Milk Master                     | 42                 | 1.6   | 36                      | 1.4   | 26         | 1.0   |
| Absolute W Milk                 | 131                | 5.0   | 87                      | 3.2   | 81         | 3.0   |

Note: The table reports gaps between actual and 'no-boycott' (counterfactual in the absence of the boycott) sales and revenues. The counterfactual sales and revenues are simulated with (i) 100 draws of  $y$  and  $v$  and (ii) counterfactual prices of boycotted brands calculated by using two alternative pre-boycott price ratios: the price ratio in April 2013, the last pre-boycott month, and the price ratio in the same month of the previous year. Sales and revenue gaps are in 1,000 liters and million KRW, respectively.

Table D5: Sensitivity analysis: Boycott effects without Namyang's price adjustment

| Product                         | 100 draws<br>of $y_i$ and $v_i$ |       | Pre-boycott price ratio |       |            |       |
|---------------------------------|---------------------------------|-------|-------------------------|-------|------------|-------|
|                                 | Gap                             | %     | Apr 2013                |       | Same month |       |
|                                 |                                 |       | Gap                     | %     | Gap        | %     |
| <u>Panel A: Sales effects</u>   |                                 |       |                         |       |            |       |
| <i>Namyang brand</i>            |                                 |       |                         |       |            |       |
| GT                              | -26,780                         | -28.2 | -23,868                 | -25.5 | -23,701    | -25.6 |
| Einstein                        | -1,696                          | -26.0 | -1,537                  | -24.1 | -1,633     | -23.9 |
| <i>Non-boycotted brand</i>      |                                 |       |                         |       |            |       |
| Seoul Milk                      | 10,087                          | 6.9   | 7,829                   | 5.3   | 7,802      | 5.3   |
| Maeil Milk                      | 4,097                           | 6.9   | 3,193                   | 5.3   | 3,189      | 5.3   |
| Mokjang                         | 1,988                           | 7.2   | 1,529                   | 5.5   | 1,521      | 5.5   |
| Low Fat Milk                    | 1,560                           | 6.8   | 1,216                   | 5.3   | 1,211      | 5.2   |
| 365                             | 631                             | 6.4   | 492                     | 5.0   | 498        | 5.0   |
| Enfant                          | 352                             | 8.5   | 266                     | 6.3   | 265        | 6.3   |
| Maeil Joeun                     | 278                             | 6.7   | 222                     | 5.3   | 221        | 5.3   |
| Sangha Mokjang                  | 224                             | 9.2   | 176                     | 7.0   | 176        | 7.0   |
| Sohwaga Jaldoeun                | 151                             | 7.4   | 117                     | 5.7   | 116        | 5.6   |
| Milk Master                     | 66                              | 5.8   | 53                      | 4.7   | 52         | 4.6   |
| Absolute W Milk                 | 59                              | 8.5   | 46                      | 6.5   | 46         | 6.5   |
| <u>Panel B: Revenue effects</u> |                                 |       |                         |       |            |       |
| <i>Namyang brand</i>            |                                 |       |                         |       |            |       |
| GT                              | -75,564                         | -28.3 | -67,603                 | -25.5 | -67,220    | -25.6 |
| Einstein                        | -6,754                          | -26.1 | -6,112                  | -24.2 | -6,411     | -24.0 |
| <i>Non-boycotted brand</i>      |                                 |       |                         |       |            |       |
| Seoul Milk                      | 28,243                          | 6.9   | 21,853                  | 5.3   | 21,782     | 5.3   |
| Maeil Milk                      | 11,044                          | 6.9   | 8,579                   | 5.3   | 8,563      | 5.3   |
| Mokjang                         | 6,134                           | 7.3   | 4,710                   | 5.5   | 4,685      | 5.5   |
| Low Fat Milk                    | 4,486                           | 6.8   | 3,486                   | 5.2   | 3,472      | 5.2   |
| 365                             | 1,481                           | 6.4   | 1,152                   | 5.0   | 1,164      | 5.0   |
| Enfant                          | 1,339                           | 8.6   | 1,011                   | 6.4   | 1,008      | 6.3   |
| Maeil Joeun                     | 774                             | 6.8   | 614                     | 5.4   | 611        | 5.3   |
| Sangha Mokjang                  | 1,153                           | 9.0   | 917                     | 7.0   | 917        | 7.0   |
| Sohwaga Jaldoeun                | 510                             | 7.4   | 394                     | 5.7   | 390        | 5.6   |
| Milk Master                     | 150                             | 5.8   | 122                     | 4.7   | 120        | 4.6   |
| Absolute W Milk                 | 230                             | 8.7   | 177                     | 6.6   | 176        | 6.5   |

Note: The table reports the sales and revenue effects of the boycott under a scenario in which Namyang did not make any price adjustments after the boycott outbreak. Predicted sales and revenues are simulated with (i) 100 draws of  $y$  and  $v$  and (ii) counterfactual prices of boycotted brands calculated by using two alternative pre-boycott price ratios: the price ratio in April 2013, the last pre-boycott month, and the price ratio in the same month of the previous year. Sales and revenue gaps are in 1,000 liters and million KRW, respectively.

Figure D1: Relative price trend of GT

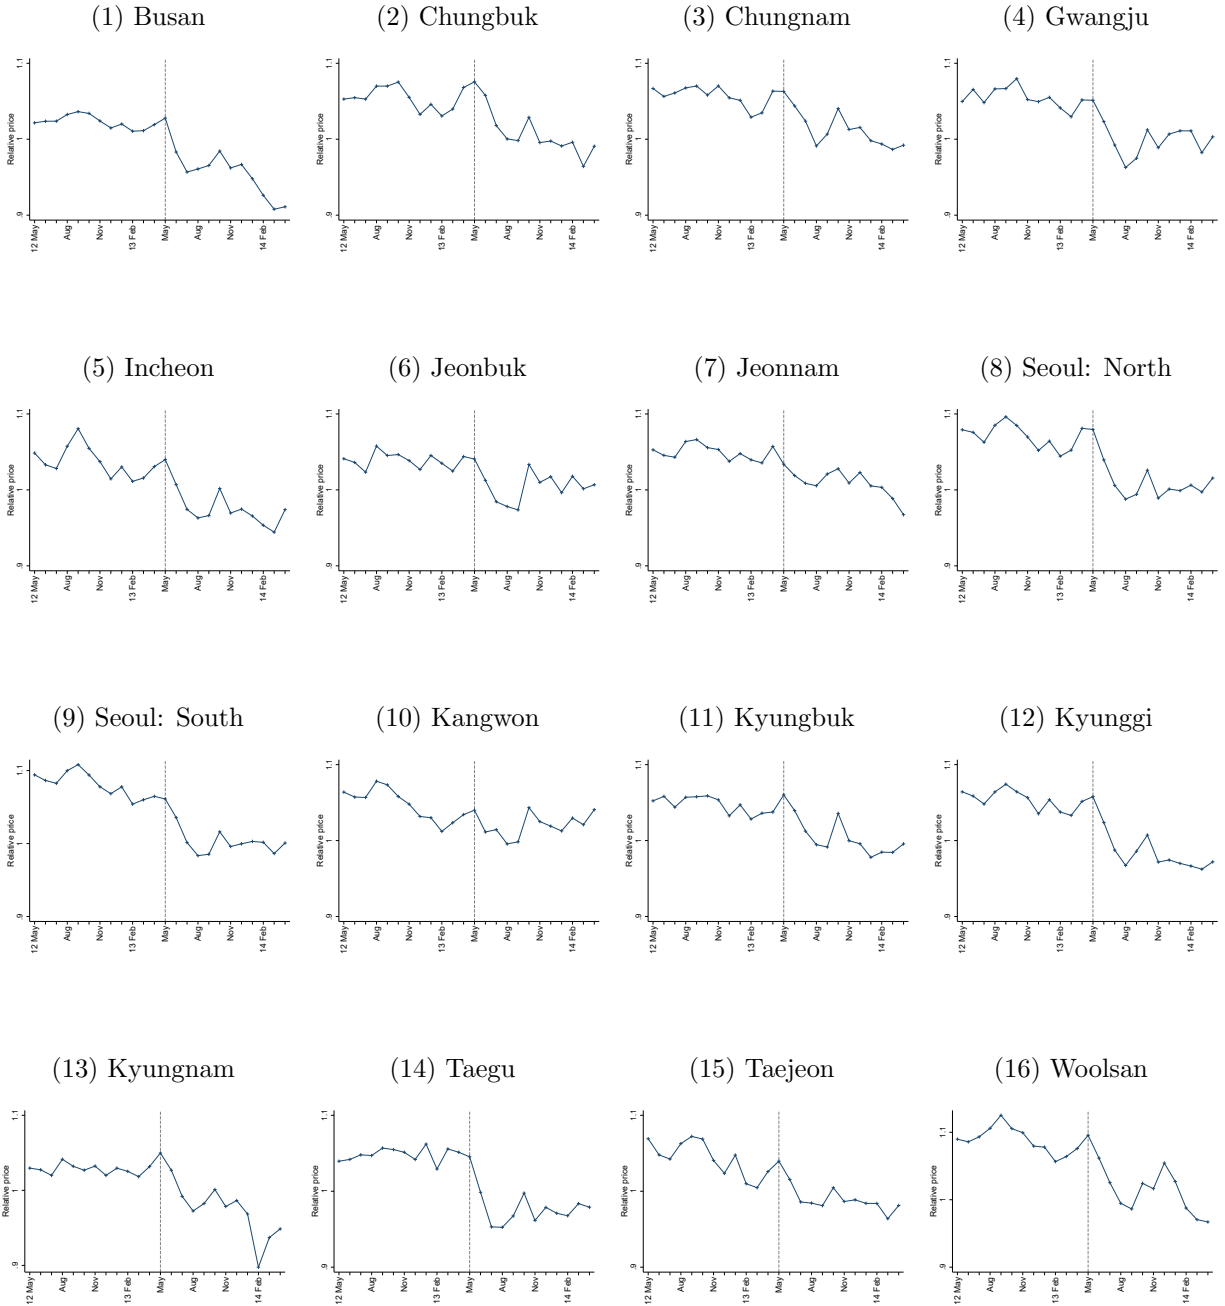

Note: The figure plots the trend in GT's price relative to the volume-weighted average price of non-boycotted brands in each of the 16 regions of South Korea.

Figure D2: Relative price trend of Einstein

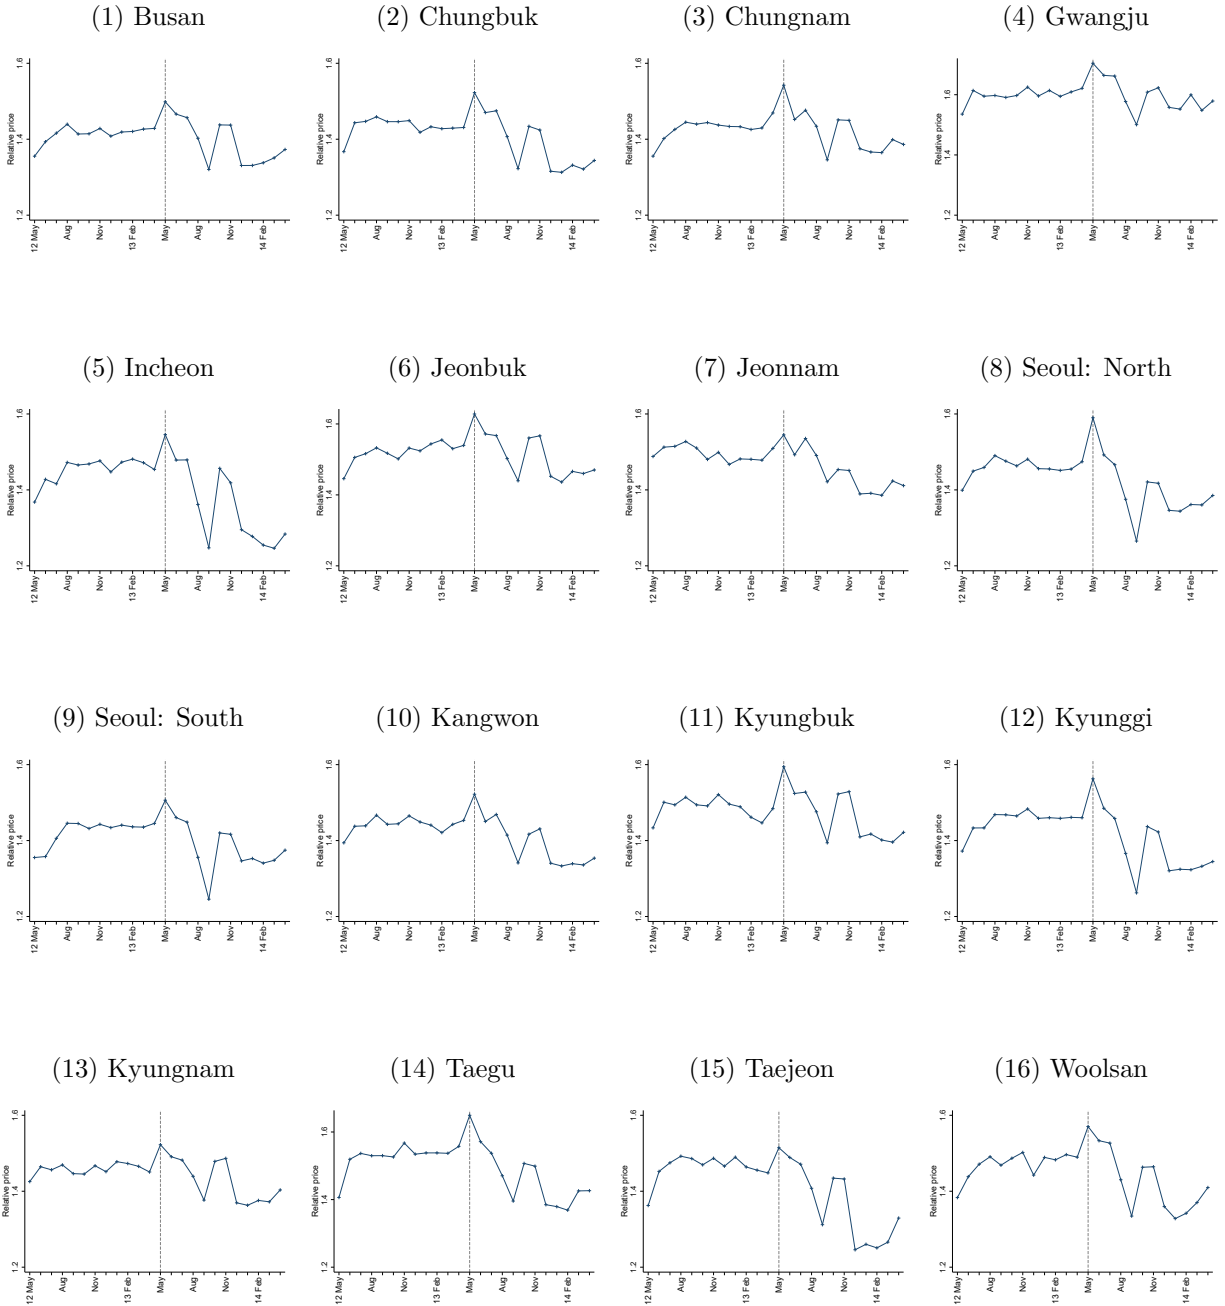

Note: The figure plots the trend in Einstein's price relative to the volume-weighted average price of non-boycotted brands in each of the 16 regions of South Korea.

## References

- PELTZMAN, S. (2000): “Prices rise faster than they fall,” *Journal of Political Economy*, 108(3), 466–502.
- TAPPATA, M. (2009): “Rockets and feathers: Understanding asymmetric pricing,” *The RAND Journal of Economics*, 40(4), 673–687.
